# Supplementary material for: Amplified surface warming in the Southwest Pacific during the mid-Pliocene (3.3–3.0 Ma) and future implications
Source: Copernicus journal article supplement (doi:10.5194/egusphere-2023-108), 2023-02-13

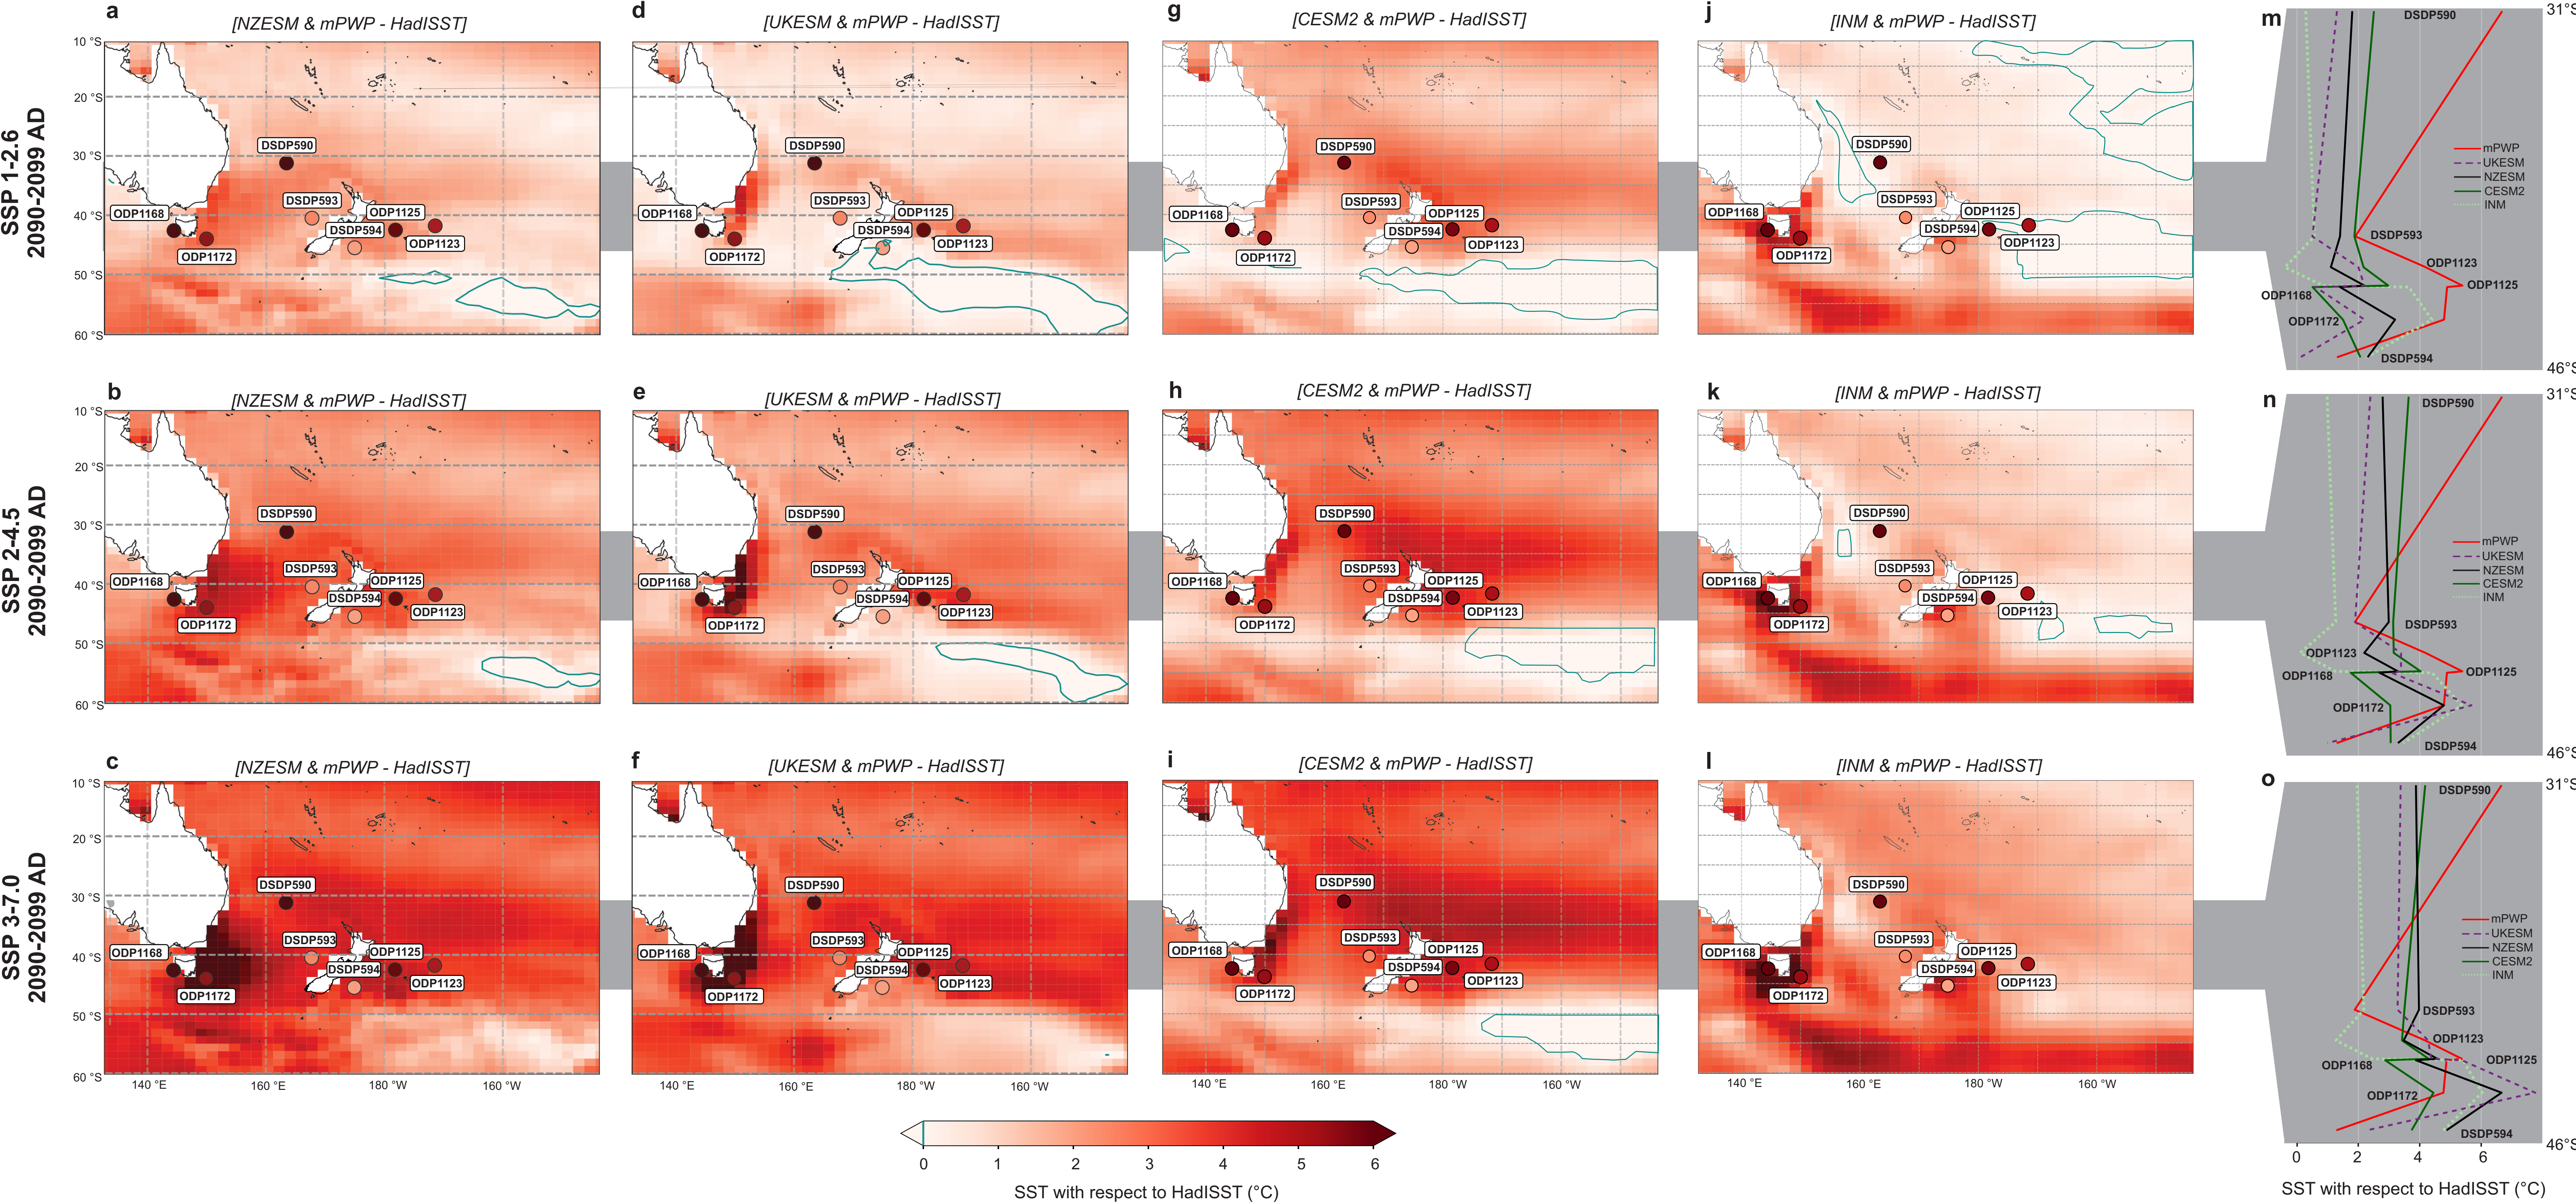

Supplement: Supplementary file [file egusphere-2023-108-AC2-supplement.pdf]
